# Supplementary material for: Polycarbonate-Based Copolymer Micelles as Biodegradable Carriers of Anticancer Podophyllotoxin or Juniper Extracts
Source: MDPI journal article supplement (doi:10.3390/jfb15030053), 2024-02-21
Supplement: s1 [file s1]

Supplementary

# Polycarbonate-Based Copolymer Micelles as Biodegradable Carriers of Anticancer Podophyllotoxin or Juniper Extracts

Radostina G. Kalinova <sup>1</sup>, Ivaylo V. Dimitrov <sup>1</sup>, Diana I. Ivanova <sup>2,\*</sup>, Yana E. Ilieva <sup>3</sup>, Alexander N. Tashev <sup>4</sup>,

Maya M. Zaharieva <sup>3</sup>, George Angelov <sup>2,\*</sup> and Hristo M. Najdenski <sup>3</sup>

<sup>1</sup> Institute of Polymers, Bulgarian Academy of Sciences, 1113 Sofia, Bulgaria; kalinova@polymer.bas.bg (R.G.K.); dimitrov@polymer.bas.bg (I.V.D.)

<sup>2</sup> Institute of Chemical Engineering, Bulgarian Academy of Sciences, 1113 Sofia, Bulgaria

<sup>3</sup> The Stephan Angeloff Institute of Microbiology, Bulgarian Academy of Sciences, 1113 Sofia, Bulgaria; illievayana@gmail.com (Y.E.I.); zaharieva26@yahoo.com (M.M.Z.); hnajdenski@abv.bg (H.M.N.)

<sup>4</sup> Department of Dendrology, University of Forestry, 1797 Sofia, Bulgaria; altashev@mail.ru

\* Correspondence: dianadoc@abv.bg (D.I.I.); georgeangelov@yahoo.com (G.A.)

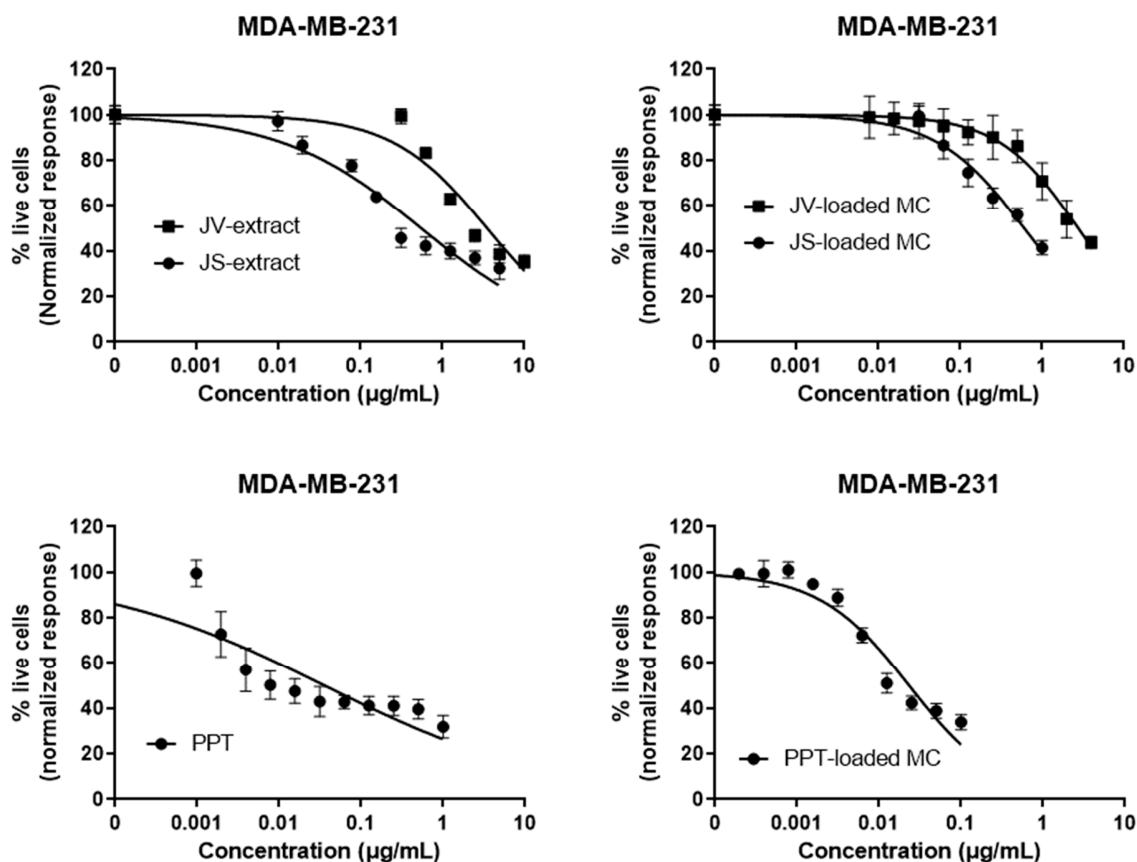

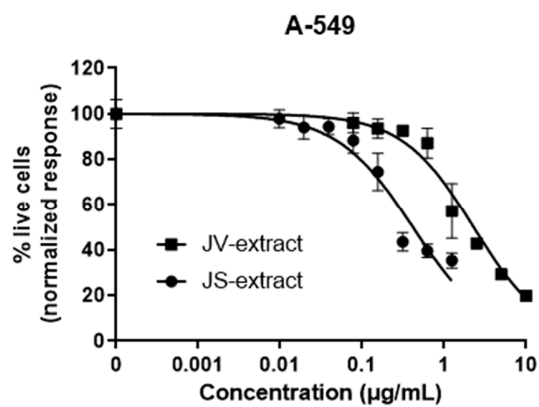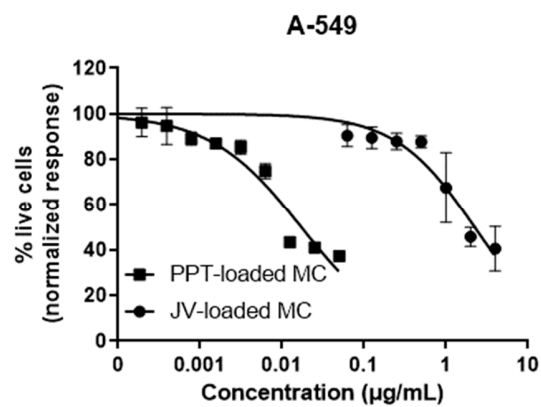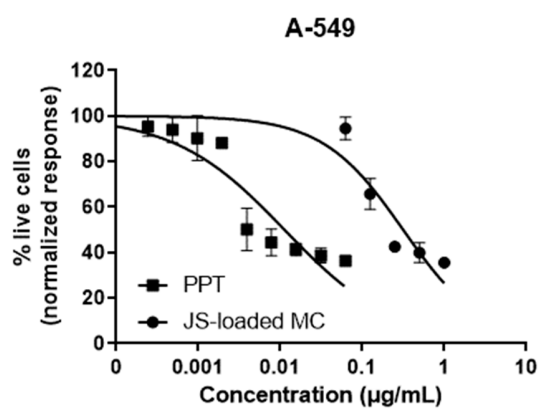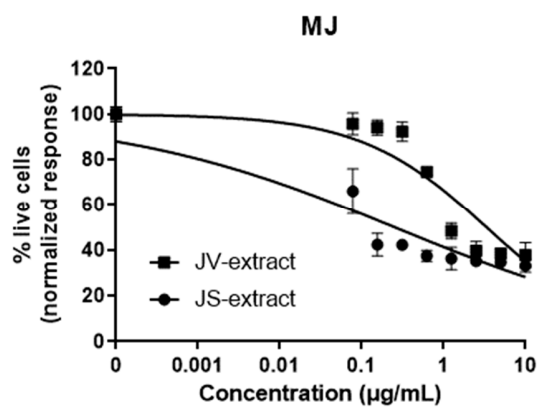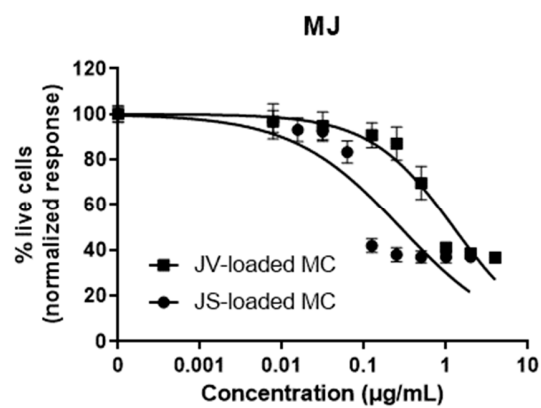

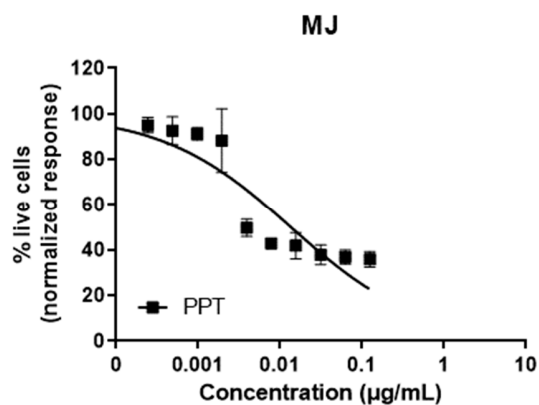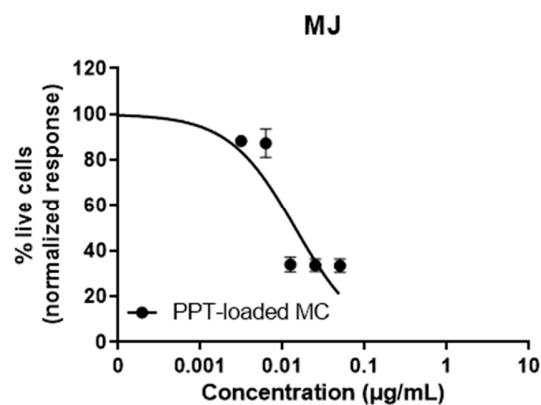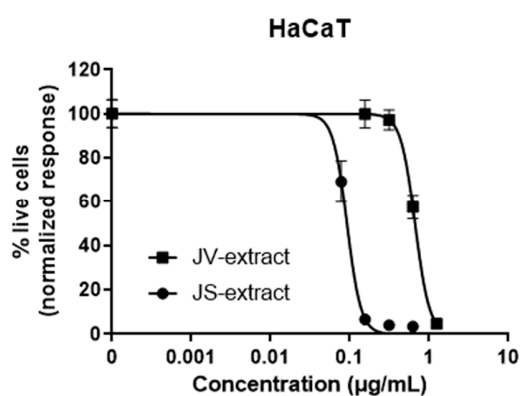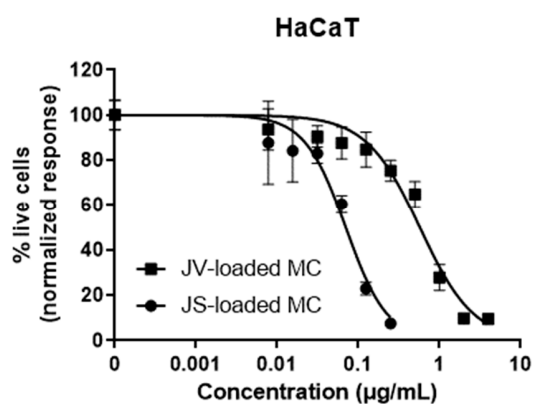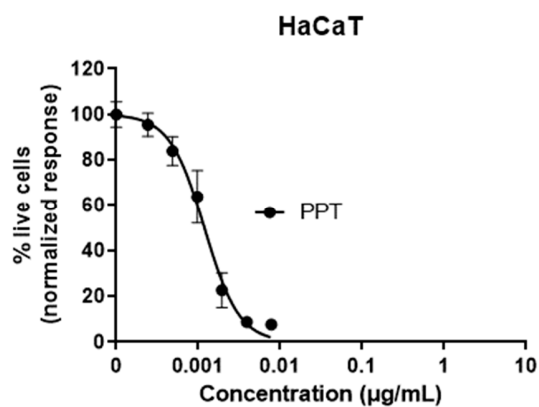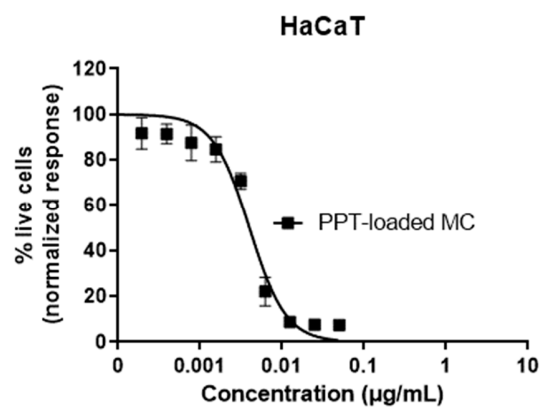

Dose-response curves derived from MTT-assays of cancer and normal cell lines treated with polymer micelles loaded with podophyllotoxin or various juniper extracts.

#### Abbreviations:

MC-polymer micelles;

JV - *J. virginiana* leaf extract;

JS – *J. sabina* var. *balkanensis* leaf extract;

PPT – podophyllotoxin;

MDA-MB-231 – triple negative (ER, PR, HER2 negative) breast adenocarcinoma cells;

A-549 – human lung carcinoma cells;

MJ – cutaneous T cell lymphoma cells;

HaCaT – normal human epidermal keratinocytes;
